# Supplementary material
Source: PubMed Central journal article supplement (PMC9008741)
Supplement: NIHMS1683273-supplement-SI.pdf [file NIHMS1683273-supplement-SI.pdf]

## Supplementary Material

# Nanoparticle Delivery Improves the Pharmacokinetic Properties of Cyclic Dinucleotide STING Agonists to Open a Therapeutic Window for Intravenous Administration

Mohamed Wehbe, Lihong Wang-Bishop, Kyle W. Becker, Daniel Shae, Jessalyn J. Baljon, Xinyi He, Plamen Christov, Kelli L. Boyd, Justin M. Balko, and John T. Wilson

## Supplementary Figures:

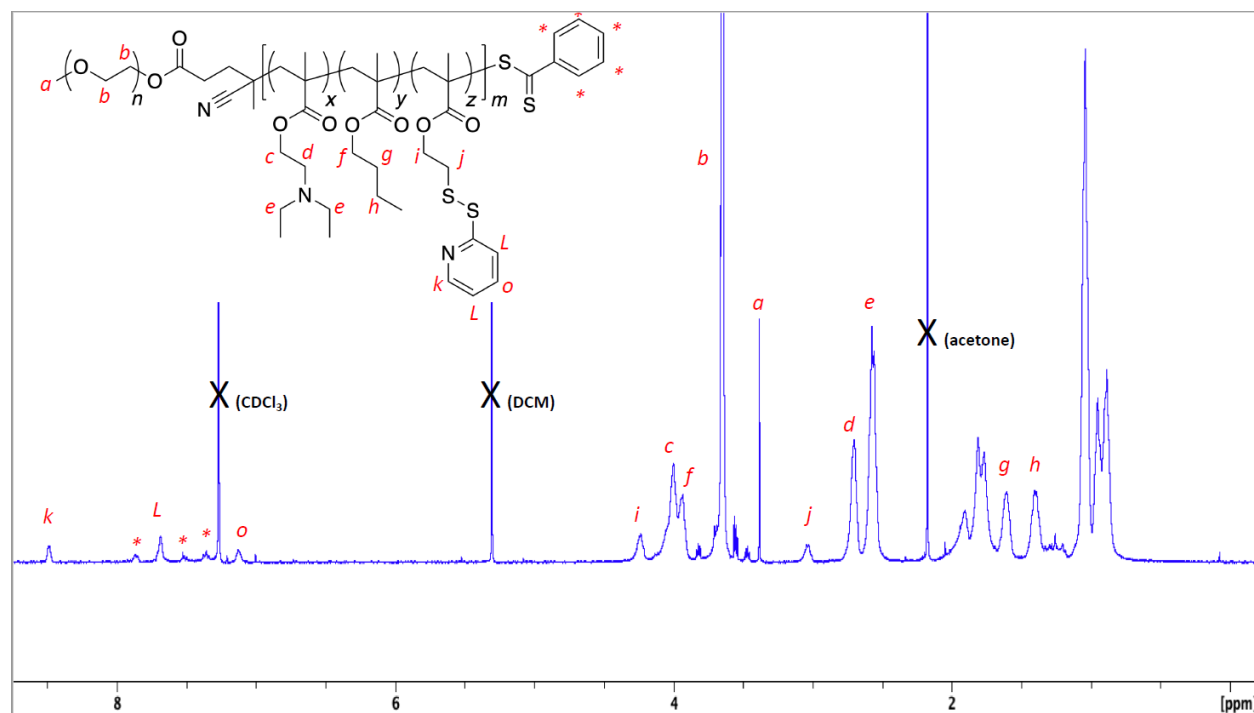

Figure S1: Representative  $^1\text{H}$  NMR spectrum of Poly[(ethylene glycol)-*block*-[(2-diethylaminoethyl methacrylate)-*co*-(butyl methacrylate)-*co*-(pyridyl disulfide ethyl methacrylate)]].

Table S1: Polymer Characterization

| Polymer                                     | DEAEMA(%) | BMA (%) | PDSMA (%) | 2 <sup>nd</sup> block DP | Total Molecular Weight (KDa)* |
|---------------------------------------------|-----------|---------|-----------|--------------------------|-------------------------------|
| PEG2 <sub>kDa</sub> -bDBP4.5 <sub>kDa</sub> | 50.6      | 42      | 7.4       | 26.5                     | 6.85                          |

\*Molecular weight was estimated based on percent monomer conversion as determined by  $^1\text{H}$  NMR.

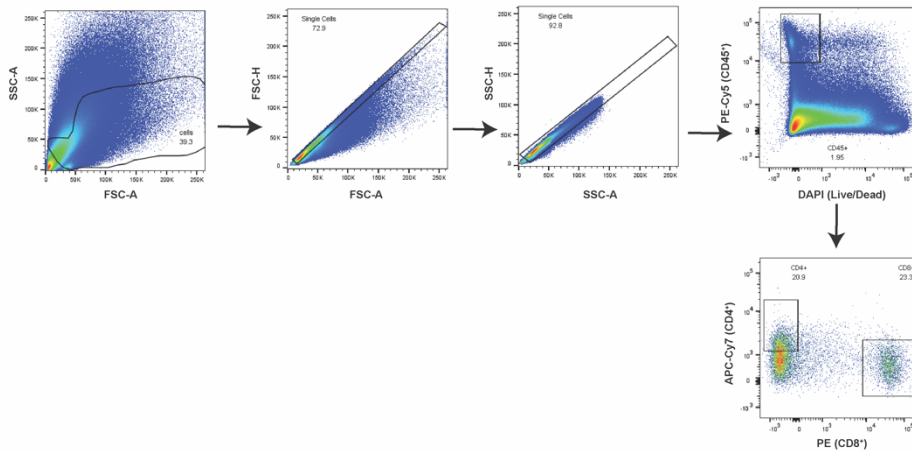

**Figure S2: Gating scheme for flow cytometric analysis of T-cell populations in the TME.**

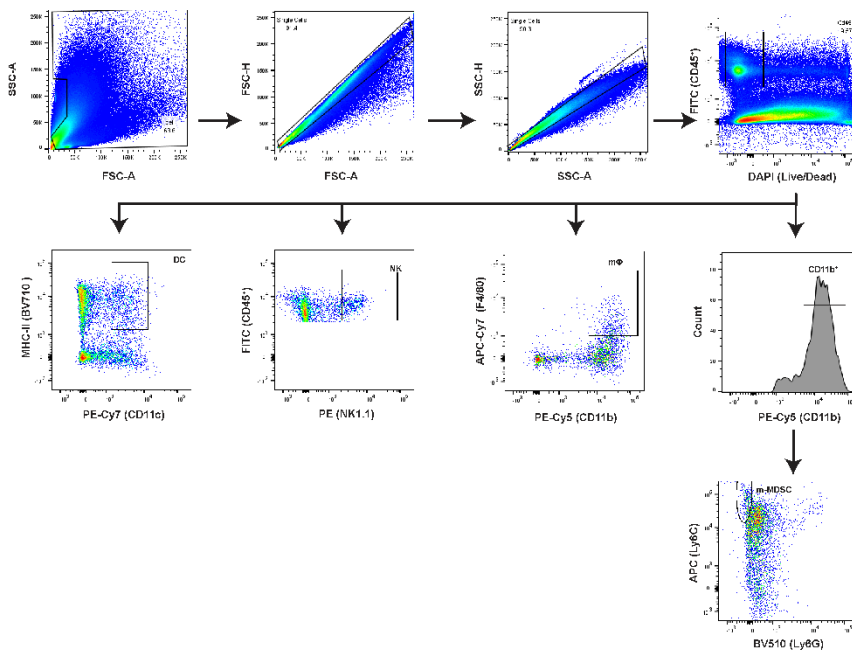

**Figure S3: Gating scheme for flow cytometric analysis of immune cell populations in the TME.**

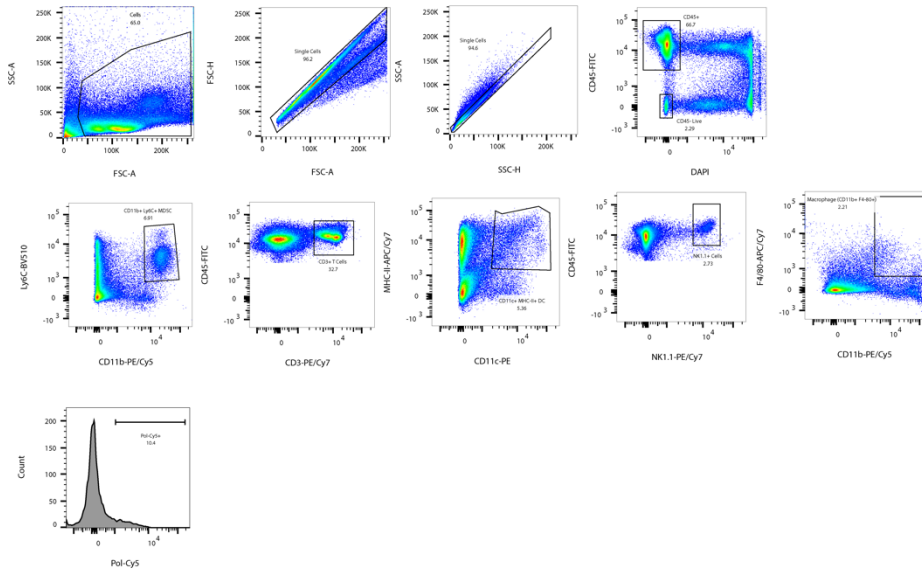

**Figure S4: Gating scheme for flow cytometric Cy5 nanoparticle uptake by cell populations in the TME.**

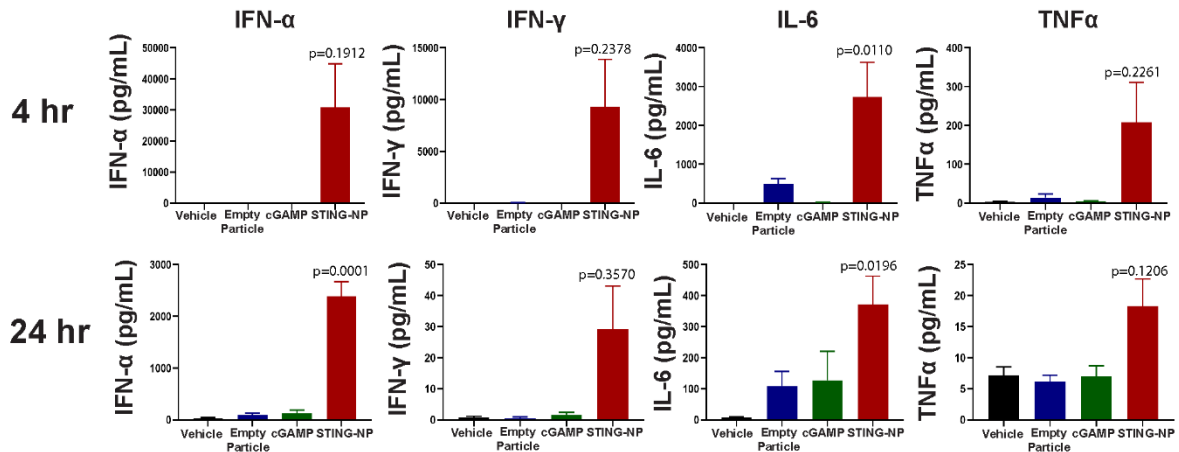

**Figure S5: Plasma concentrations of cytokines (of IFN-α, IFN-γ IL-6 and TNF-α) at 4 and 24 hr post-treatment.** C57BL/6 mice were treated with Vehicle (PBS), empty particle, cGAMP and STING-NP intravenously, plasma was separated and frozen (-80°C) until analysis by multiplexed bead array.

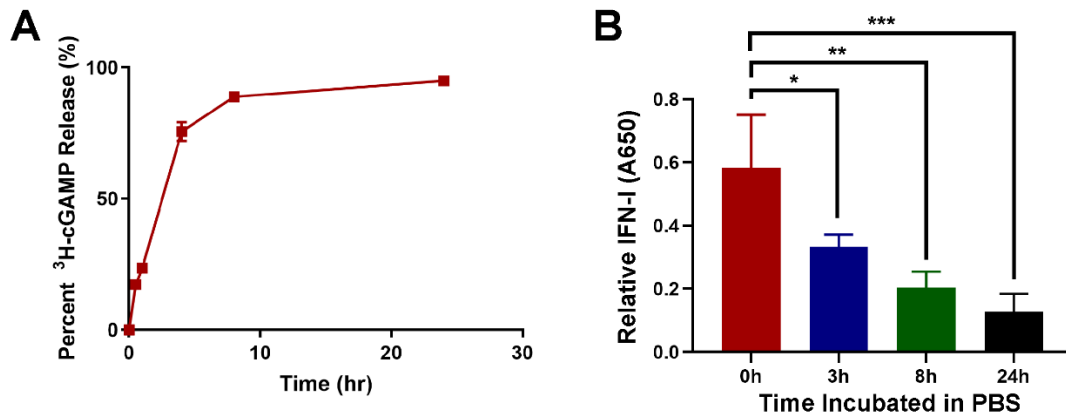

**Figure S6: cGAMP release from polymersomes.** (A) <sup>3</sup>H-cGAMP release was measured using slide-a-lyzer® mini dialysis device (20KDa) over 24 hours. (B) Activity of STING-NPs (125 nM) in RAW-Blue™ reporter cells upon incubation with PBS at 37°C for indicated times. \* $P < 0.05$ , \*\* $P < 0.01$ , \*\*\* $P < 0.001$ , \*\*\*\* $P < 0.0001$  indicate a statistically significant difference relative to “0 hr” by one-way ANOVA and Tukey’s post-hoc test.

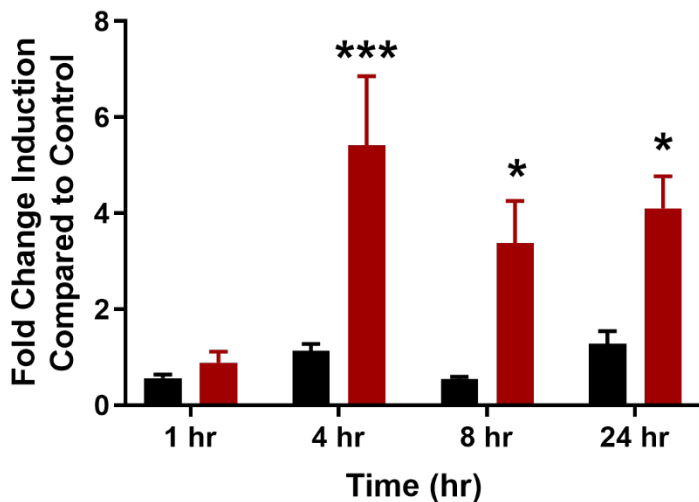

**Figure S7: Expression of PD-L1 in tumors treated with cGAMP (black) or STING-NP (red).** (A) 6-8-week-old C57BL/6 B16-F10 tumor bearing mice were treated with vehicle, cGAMP (20  $\mu$ g per mouse), or STING-NP (10  $\mu$ g cGAMP per mouse). qRT-PCR was used to measure *Pdl1* transcript levels in cGAMP or STING-NP treated tumor. (n=4, data is shown as mean  $\pm$  SD fold change over vehicle treated mice). \* $P < 0.05$ , \*\*\* $P < 0.001$ , indicate a statistically significant difference determined by one-way ANOVA followed by Tukey’s adjustment to account for multiple comparisons.
